# Supplementary material for: Deriving a Transformation Rate Map of Dissolved Organic Carbon over the Contiguous U.S.
Source: Copernicus journal article supplement (doi:10.5194/essd-2024-43), 2024-04-02
Supplement: Supplementary file 1 [file essd-2024-43-supplement.pdf]

*Supplement of*

## **Deriving a Transformation Rate Map of Dissolved Organic Carbon over the Contiguous U.S.**

**Lingbo Li et al.**

5 *Correspondence to:* Hong-Yi Li ([hongyili.jadison@gmail.com](mailto:hongyili.jadison@gmail.com))

The copyright of individual parts of the supplement might differ from the article licence.

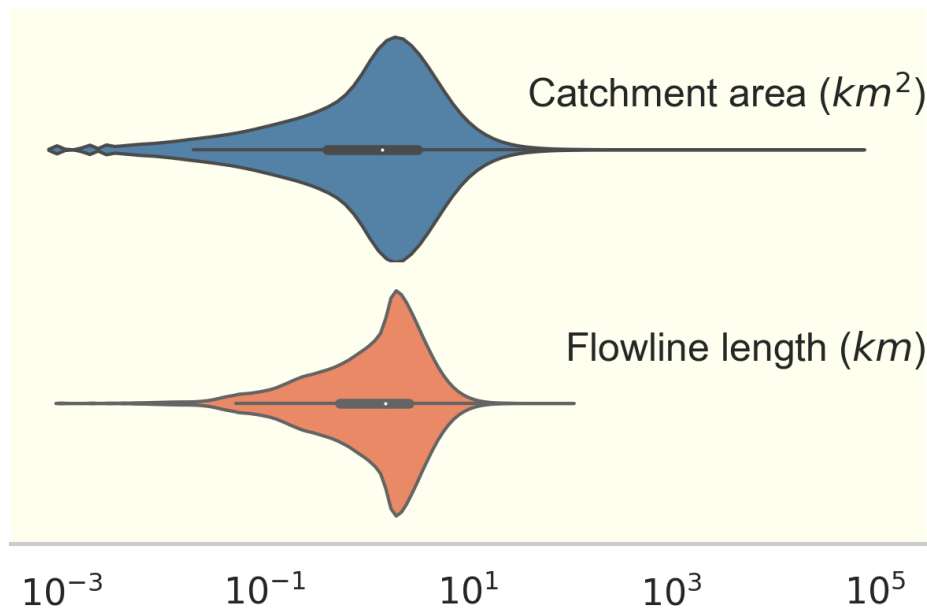

10

**Figure S1. Distribution of the NHDPlus local catchment area and length of flowlines.**

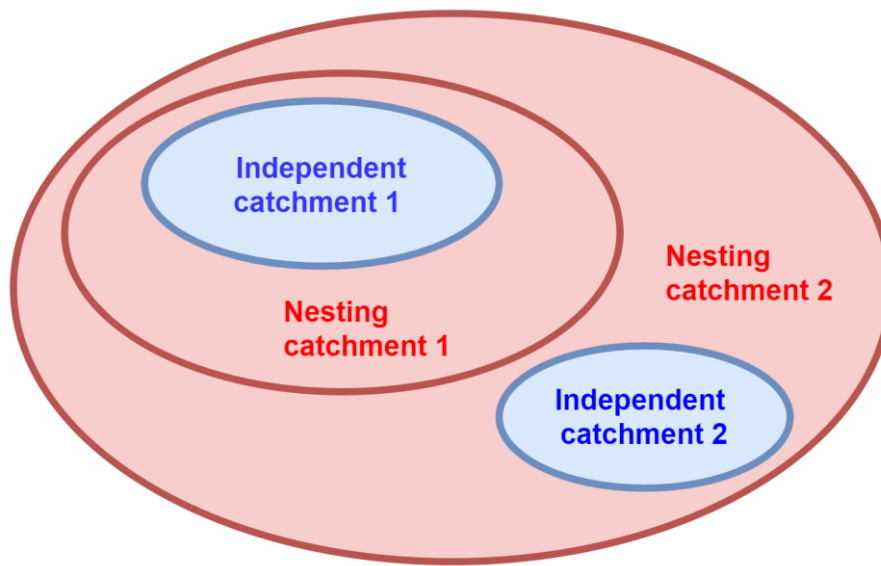

**Figure S2. Conceptual diagram of identifying independent catchment.**

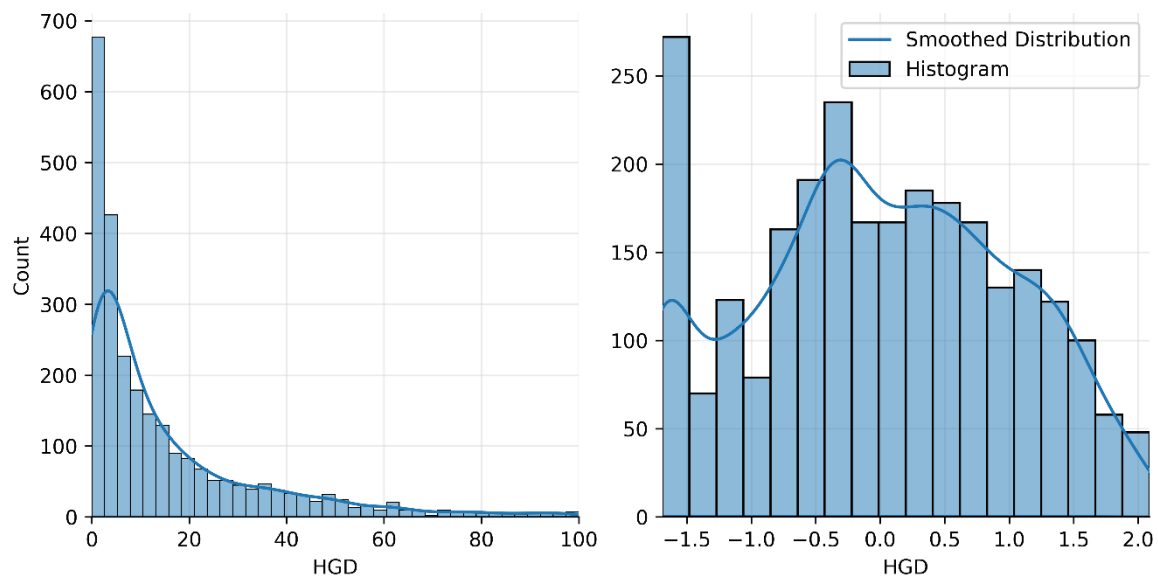

15 **Figure S3. Histogram of the percentage of hydrologic group D soil (HGD) predictor before (left panel) and after (right panel) power transformation.**

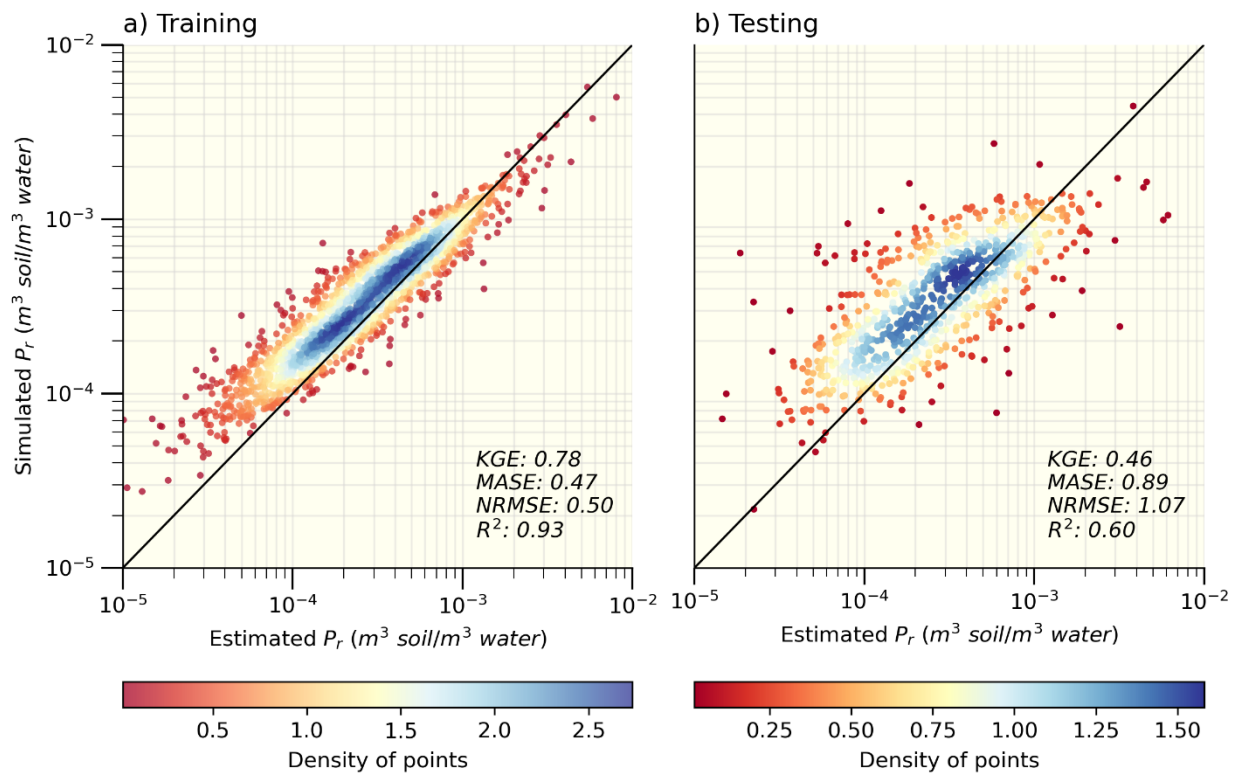

Figure S4. Performance of the XGBoost model with 12 predictors trained by using KGE during a) the training phase (n=1816) and b) the testing phase (n=779). The solid black line indicates a 1:1 ratio. Note that the axes are in a log-log scale.

a)  $C_{soc}$

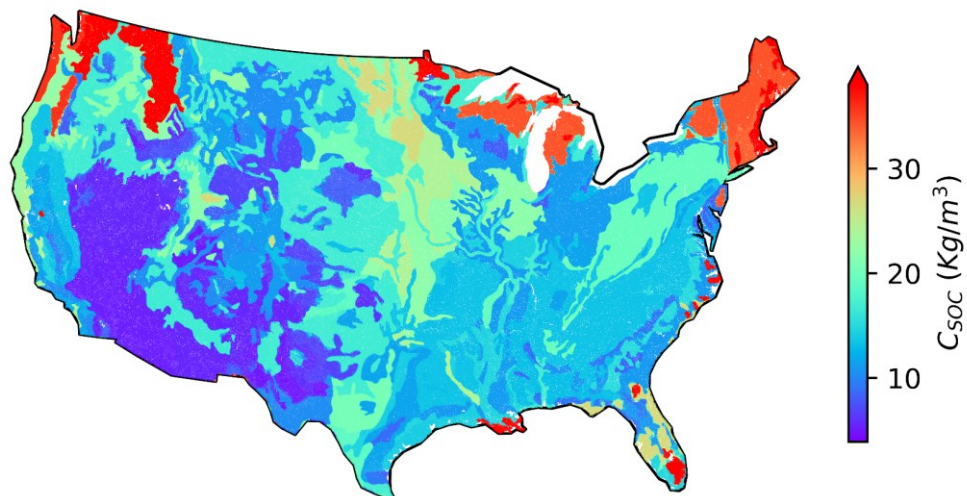

b) Woody wetland percentage

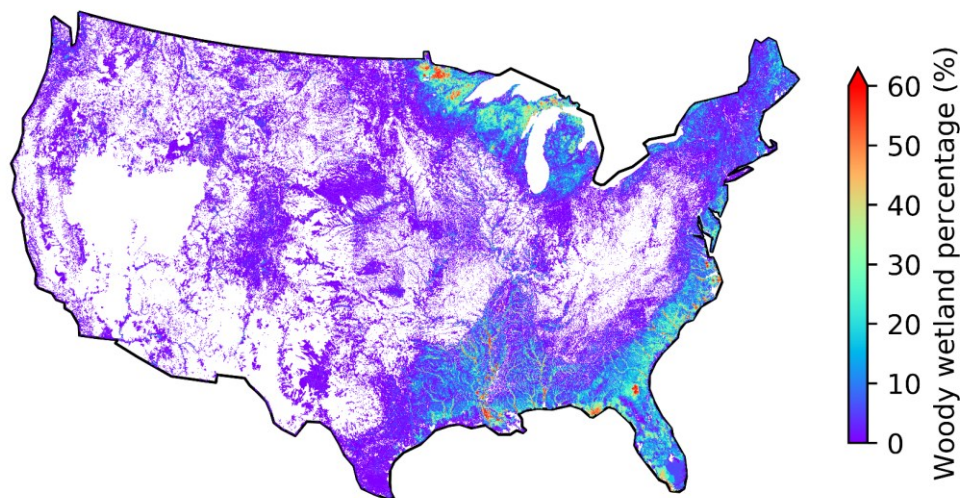

Figure S5. CONUS maps of: a) HWSO top-layer soil organic carbon (SOC) concentration, and b) woody wetland fraction across over 2 million NHDPlus catchments. Regions displayed in white may indicate missing data or a zero fraction.

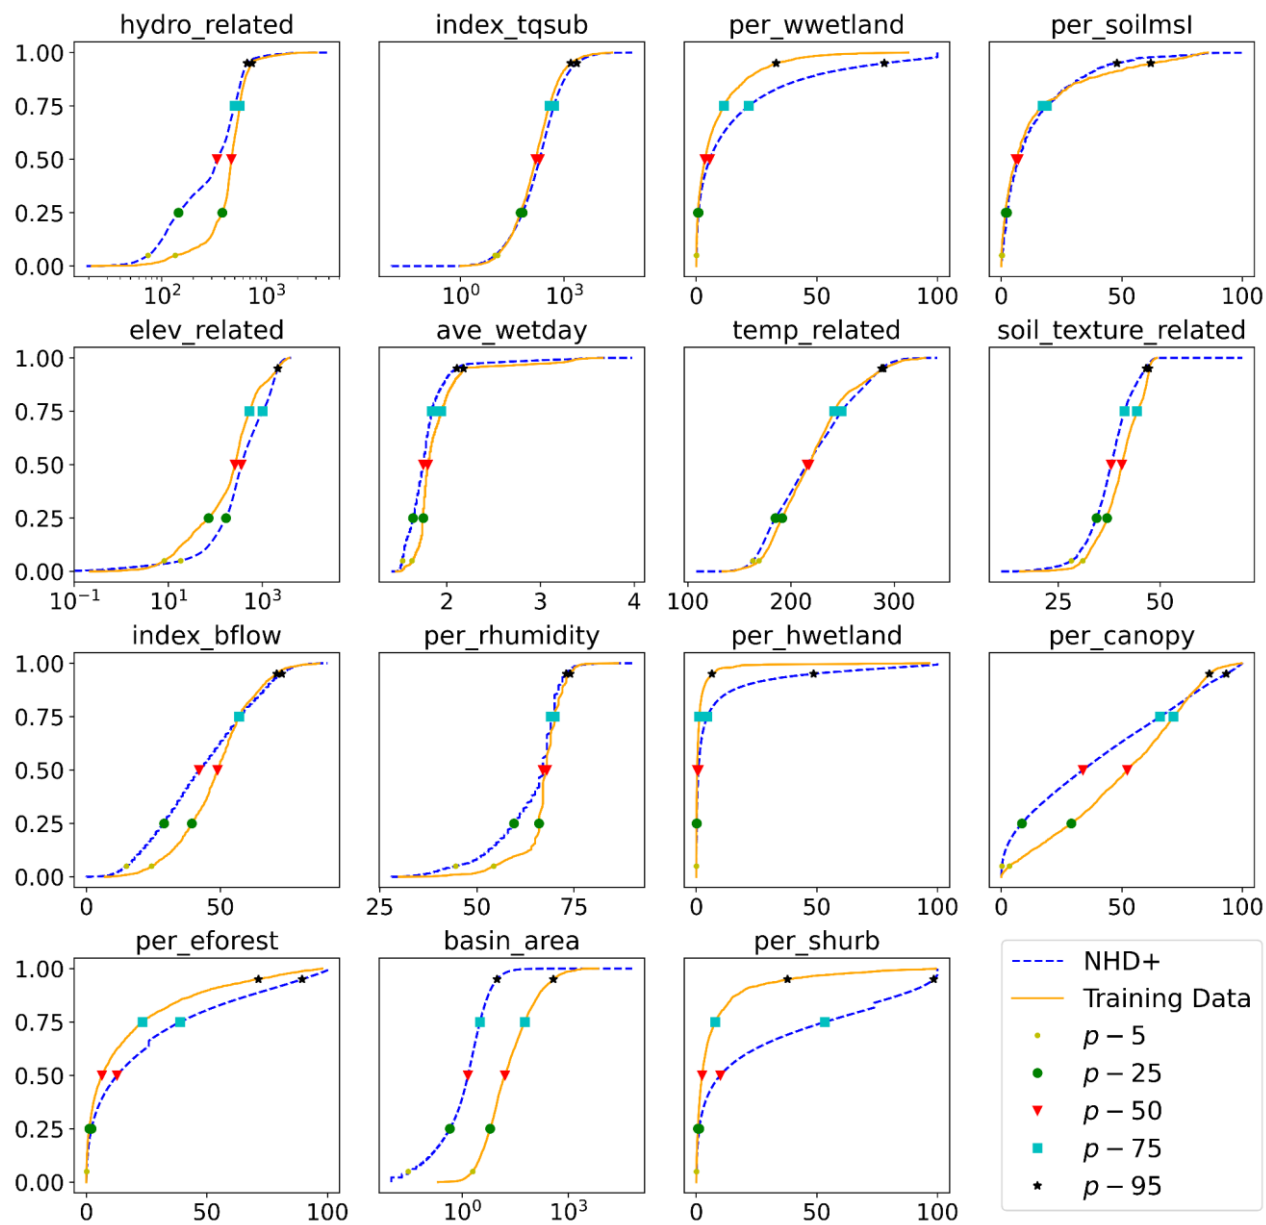

**Figure S6. Comparison of the cumulative distribution function (CDF) of 15 selected predictors between training data and all flowlines (i.e., NHDPlus).**

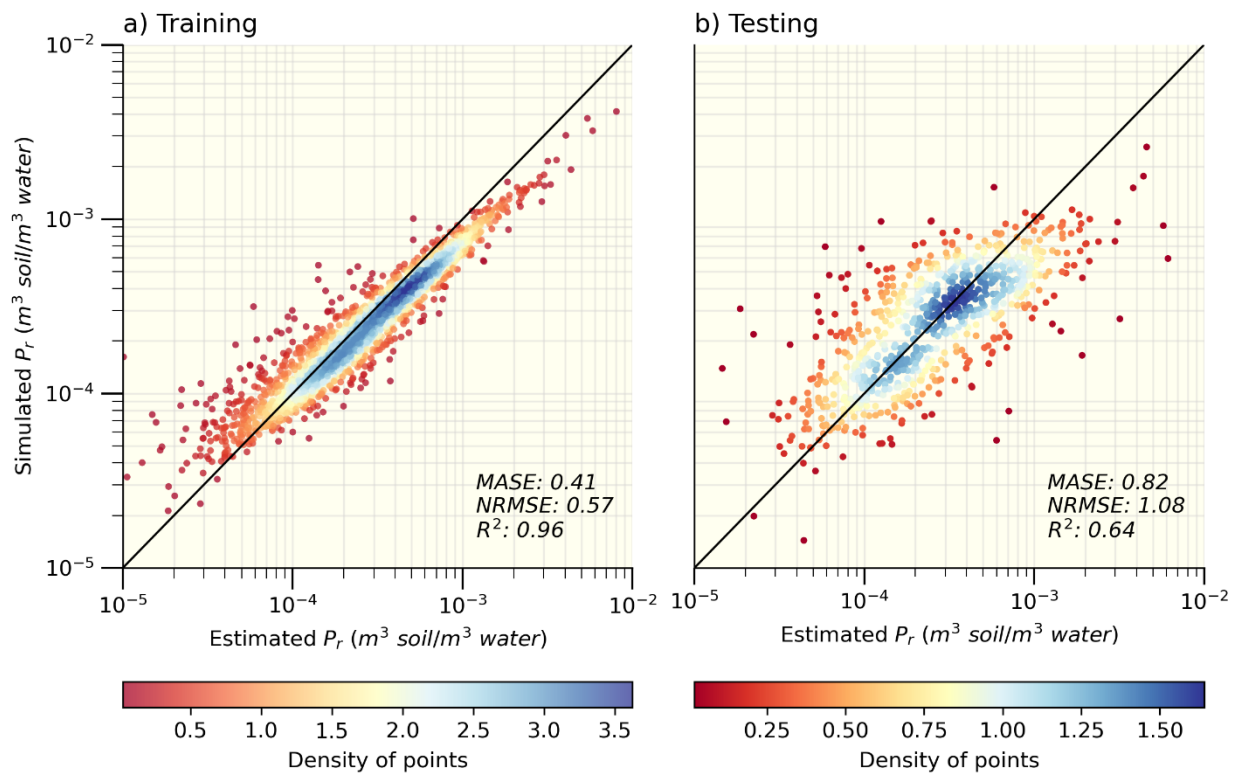

**Figure S7. Performance of the XGBoost model with 15 predictors during a) the training phase (n=1816) and b) the testing phase (n=779). The solid black line indicates a 1:1 ratio. Note that the axes are in a log-log scale.**

**Table S1. List of 46 independent predictive attributes**

| Group                    | Acronym      | Description                                                                                                                                                                                |
|--------------------------|--------------|--------------------------------------------------------------------------------------------------------------------------------------------------------------------------------------------|
| Chemical                 | NEMATICIDE   | Nematicide use on agricultural land (kg/km <sup>2</sup> )                                                                                                                                  |
| Climate                  | CWD          | Average number of consecutive days with measurable precipitation                                                                                                                           |
|                          | MINP6190     | Watershed minimum average annual precipitation (mm)                                                                                                                                        |
|                          | MINWD6190    | Watershed average of minimum monthly number of days of measurable precipitation                                                                                                            |
|                          | RH           | Percent of the watershed average relative humidity                                                                                                                                         |
| Geology                  | BEDPERM_1    | Percent of NHDPlus version 2 flowline catchment whose bedrock permeability class is not a principal aquifer                                                                                |
|                          | BEDPERM_6    | Percent of NHDPlus version 2 flowline catchment whose bedrock permeability class is unconsolidated sand and gravel                                                                         |
|                          | OLSON_PERM   | Rock hydraulic conductivity (10 <sup>-6</sup> m/s)                                                                                                                                         |
|                          | ROCKTYPE_200 | Estimated percent of catchment that is underlain by the principal aquifer rock type, semi-consolidated sand aquifers                                                                       |
|                          | ROCKTYPE_999 | Estimated percent of catchment that is underlain by the principal aquifer rock type, other rocks                                                                                           |
| Hydrologic               | BFI          | Base Flow Index, a ratio of base flow to total streamflow, expressed as a percentage and ranging from 0 to 100                                                                             |
|                          | CONTACT      | The Subsurface flow contact time index estimates the duration infiltrated water resides in the saturated subsurface zone of the basin before discharging into the stream, measured in days |
|                          | IEOF         | Percent of Horton overland flow                                                                                                                                                            |
|                          | SATOF        | Percent of Dunne overland flow                                                                                                                                                             |
| Hydrologic Modifications | DITCHES92    | Percent of watershed subjected to ditches for the year 1992                                                                                                                                |
|                          | MIRAD_2002   | Percent of watershed in irrigated agriculture, from USGS 2002 250-m MODIS data                                                                                                             |

|            |                |                                                                                                                                                                                                                                                                                                                                |
|------------|----------------|--------------------------------------------------------------------------------------------------------------------------------------------------------------------------------------------------------------------------------------------------------------------------------------------------------------------------------|
|            | MIRAD_2007     | Percent of watershed in irrigated agriculture, from USGS 2007 250-m MODIS data                                                                                                                                                                                                                                                 |
|            | MIRAD_2012     | Percent of watershed in irrigated agriculture, from USGS 2012 250-m MODIS data                                                                                                                                                                                                                                                 |
|            | TILES92        | Percent of watershed subjected to tile drains for the year 1992                                                                                                                                                                                                                                                                |
| Land Cover | CNPY11_BUFF100 | Percent of tree canopy in 100meter riparian buffer                                                                                                                                                                                                                                                                             |
|            | LAKEPOND       | Percent of lakes or ponds                                                                                                                                                                                                                                                                                                      |
|            | NLCD01_11      | Areal percent of 2001 land-use and land-cover type Open Water: All areas of open water, generally with less than 25 percent cover of vegetation or soil.                                                                                                                                                                       |
|            | NLCD01_31      | Areal percent of 2001 land-use and land-cover type Barren Land: Barren areas of bedrock, desert pavement, scarps, talus, slides, volcanic material, glacial debris, sand dunes, strip mines, gravel pits, and other accumulations of earthen material. Generally, vegetation accounts for less than 15 percent of total cover. |
|            | NLCD01_41      | Areal percent of 2001 land-use and land-cover type Deciduous Forest: Areas dominated by trees generally greater than 5 meters tall, and greater than 20 percent of total vegetation cover. More than 75 percent of the tree species shed foliage simultaneously in response to seasonal change.                                |
|            | NLCD01_42      | Areal percent of 2001 land-use and land-cover type Evergreen Forest: Areas dominated by trees generally greater than 5 meters tall, and greater than 20 percent of total vegetation cover. More than 75 percent of the trees maintain their leaves all year. Canopy is never without green foliage.                            |
|            | NLCD01_43      | Areal percent of 2001 land-use and land-cover type Mixed Forest: Areas dominated by trees generally greater than 5 meters tall, and greater than 20 percent of total vegetation cover. Neither deciduous nor evergreen species are greater than 75 percent of total tree cover.                                                |
|            | NLCD01_52      | Areal percent of 2001 land-use and land-cover type Shrub/Scrub: Areas dominated by shrubs less than 5 meters tall. Shrub canopy is typically greater than 20 percent of total vegetation. This class includes true shrubs, young trees in an early successional stage or trees stunted from environmental conditions.          |
|            | NLCD01_71      | Areal percent of 2001 land-use and land-cover type Grassland/Herbaceous: Areas dominated by graminoid or herbaceous vegetation, generally greater than 80 percent of total vegetation. These areas are not subject to intensive management such as tilling, but can be utilized for grazing.                                   |

|       |            |                                                                                                                                                                                                                                                                                                            |
|-------|------------|------------------------------------------------------------------------------------------------------------------------------------------------------------------------------------------------------------------------------------------------------------------------------------------------------------|
|       | NLCD01_81  | Areal percent of 2001 land-use and land-cover type Pasture/Hay: Areas of grasses, legumes, or grass-legume mixtures planted for livestock grazing or the production of seed or hay crops, typically on a perennial cycle. Pasture/hay vegetation accounts for greater than 20 percent of total vegetation. |
|       | NLCD01_90  | Areal percent of 2001 land-use and land-cover type Woody Wetlands: Areas where forest or shrubland vegetation accounts for greater than 20 percent of vegetative cover and the soil or substrate is periodically saturated with or covered with water.                                                     |
|       | NLCD01_95  | Areal percent of 2001 land-use and land-cover type Emergent Herbaceous Wetlands: Areas where perennial herbaceous vegetation accounts for greater than 80 percent of vegetative cover and the soil or substrate is periodically saturated with or covered with water.                                      |
|       | SWAMPMARSH | Percent of swamps or marshes                                                                                                                                                                                                                                                                               |
| Soils | CLAYAVE    | Percent of average clay content                                                                                                                                                                                                                                                                            |
|       | HGA        | Areal percent of Hydrologic Group A soil. Hydrologic group A soils have high infiltration rates. Soils are deep and well drained and, typically, have high sand and gravel content                                                                                                                         |
|       | HGAD       | Areal percent of Hydrologic Group AD soil. Hydrologic group AD soils have group A characteristics (high infiltration rates) when artificially drained and have group D characteristics (very slow infiltration rates) when not drained                                                                     |
|       | HGB        | Areal percent of Hydrologic Group B soil. Hydrologic group B soils have moderate infiltration rates. Soils are moderately deep, moderately well drained, and moderately coarse in texture                                                                                                                  |
|       | HGBD       | Areal percent of Percentage of Hydrologic Group BD soil. Hydrologic group BD soils have group B characteristics (moderate infiltration rates) when artificially drained and have group D characteristics (very slow infiltration rates) when not drained                                                   |
|       | HGC        | Areal percent of Hydrologic Group C soil. Hydrologic group C soils have slow soil infiltration rates. The soil profiles include layers impeding downward movement of water and, typically, have moderately fine or fine texture                                                                            |
|       | HGCD       | Areal percent of Hydrologic Group CD soil. Hydrologic group CD soils have group C characteristics (slow infiltration rates) when artificially drained and have group D characteristics (very slow infiltration rates) when not drained                                                                     |
|       | HGD        | Areal percent of Percentage of Hydrologic Group D soil. Hydrologic group D soils have very slow infiltration rates. Soils are clayey, have a high water table, or have a shallow impervious layer                                                                                                          |

|             |               |                                                              |
|-------------|---------------|--------------------------------------------------------------|
|             | SALINAVE      | Salinity measured as average millimhos per centimeter        |
| Topographic | ARTIFICIAL    | Flowlines coded as Artificial paths                          |
|             | BASIN_AREA    | NHDPlusV2 flowline catchment area (km <sup>2</sup> )         |
|             | RDX           | Number of road and stream intersections                      |
|             | STREAMRIVER   | Flowlines coded as Streams or Rivers                         |
| Water Use   | FRESHWATER_WD | Freshwater withdrawals from 1995-2000 county-level estimates |

**Table S2. List of 49 correlated predictive attributes**

| Correlated Group  | Acronym     | Description                                                                                                             |
|-------------------|-------------|-------------------------------------------------------------------------------------------------------------------------|
| hydro_related     | RECHG       | Mean annual natural groundwater recharge (mm/yr).                                                                       |
|                   | WB5100_ANN  | Annual averaged runoff from McCabe and Wolock's Runoff Model 1951-2000 (mm).                                            |
|                   | MAXP6190    | Watershed maximum average annual precipitation (mm).                                                                    |
|                   | PPT7100_ANN | Mean annual precipitation for the watershed, from 800m PRISM data (mm). 30 years period of record 1971-2000.            |
|                   | RUN7100     | Estimated 30-year (1971-2000) average annual runoff (mm/yr).                                                            |
| temp_related      | PET         | Mean annual potential evapotranspiration (PET), estimated using the Hamon equation.                                     |
|                   | FSTFZ6190   | Watershed average of mean day of the year of first freeze, derived from 30 years of record (1961-1990), 2km PRISM.      |
|                   | LSTFZ6190   | Watershed average of mean day of the year of last freeze, derived from 30 years of record (1961-1990), 2km PRISM.       |
|                   | PRSNOW      | Snow percent of total precipitation estimate, mean for period 1901-2000.                                                |
|                   | ET          | Mean-annual actual evapotranspiration (ET), estimated using regression equation of Sanford and Selnick (2013).          |
|                   | TMAX7100    | Watershed average of maximum monthly air temperature from 800m PRISM, derived from 30 years (1971-2000) of record (°C). |
|                   | TAV7100_ANN | Watershed average of monthly air temperature from 800m PRISM, derived from 30 years (1971-2000) of record (°C).         |
| agri_chem_related | TMIN7100    | Watershed average of minimum monthly air temperature from 800m PRISM, derived from 30 years (1971-2000) of record (°C). |
|                   | FUNGICIDE   | Fungicide use on agricultural land (kg/km <sup>2</sup> ).                                                               |
|                   | HERBICIDE   | Herbicide use on agricultural land (kg/km <sup>2</sup> ).                                                               |

|               |                |                                                                                                                                                                                                                                                                                                                                                                                |
|---------------|----------------|--------------------------------------------------------------------------------------------------------------------------------------------------------------------------------------------------------------------------------------------------------------------------------------------------------------------------------------------------------------------------------|
|               | INSECTICIDE    | Insecticide use on agricultural land (kg/km <sup>2</sup> ).                                                                                                                                                                                                                                                                                                                    |
|               | N97            | Estimated nitrogen from fertilizer and manure.                                                                                                                                                                                                                                                                                                                                 |
|               | P97            | Estimated phosphorous from fertilizer and manure.                                                                                                                                                                                                                                                                                                                              |
|               | NLCD01_82      | Areal percent of 2001 land-use and land-cover type Cultivated Crops: Areas used for the production of annual crops, such as corn, soybeans, vegetables, tobacco, and cotton, and also perennial woody crops such as orchards and vineyards. Crop vegetation accounts for greater than 20 percent of total vegetation. This class also includes all land being actively tilled. |
|               | PEST219        | Estimate of agricultural pesticide application (kg/km <sup>2</sup> ).                                                                                                                                                                                                                                                                                                          |
|               | KGBI           | Toxicity Weighted Use for benthic invertebrates on agricultural land, 2013 (kg/km <sup>2</sup> ).                                                                                                                                                                                                                                                                              |
|               | KGCLADO        | Toxicity Weighted Use for cladocerans on agricultural land, 2013 (kg/km <sup>2</sup> ).                                                                                                                                                                                                                                                                                        |
|               | KGFISH         | Toxicity Weighted Use for fish on agricultural land, 2013 (kg/km <sup>2</sup> ).                                                                                                                                                                                                                                                                                               |
| urban_related | POPDENS90      | Population density from 1990 Census block level data, persons per km <sup>2</sup> per NHDPlus version 2 catchment.                                                                                                                                                                                                                                                             |
|               | IMPV01_BUFF100 | NLCD 2001 percent of imperviousness in the 100meter riparian buffer zones.                                                                                                                                                                                                                                                                                                     |
|               | IMPV06         | NLCD 2006 percent of imperviousness per NHDPlus version 2 catchment.                                                                                                                                                                                                                                                                                                           |
|               | IMPV06_BUFF100 | NLCD 2006 percent of imperviousness in the 100meter riparian buffer zones.                                                                                                                                                                                                                                                                                                     |
|               | POPDENS00      | Population density from 2000 Census block level data, persons per km <sup>2</sup> per NHDPlus version 2 catchment.                                                                                                                                                                                                                                                             |
|               | POPDENS10      | Population density from 2010 Census block level data, persons per km <sup>2</sup> per NHDPlus version 2 catchment.                                                                                                                                                                                                                                                             |

|                          |                 |                                                                                                                                                                                                                                                                                                                                                                                                                                                                   |
|--------------------------|-----------------|-------------------------------------------------------------------------------------------------------------------------------------------------------------------------------------------------------------------------------------------------------------------------------------------------------------------------------------------------------------------------------------------------------------------------------------------------------------------|
|                          | NLCD01_21       | Areal percent of 2001 land-use and land-cover type Developed, Open Space: Includes areas with a mixture of some constructed materials, but mostly vegetation in the form of lawn grasses. Impervious surfaces account for less than 20 percent of total cover. These areas most commonly include large-lot single-family housing units, parks, golf courses, and vegetation planted in developed settings for recreation, erosion control, or aesthetic purposes. |
|                          | NLCD01_22       | Areal percent of 2001 land-use and land-cover type Developed, Low Intensity: Includes areas with a mixture of constructed materials and vegetation. Impervious surfaces account for 20-49 percent of total cover. These areas most commonly include single-family housing units.                                                                                                                                                                                  |
|                          | NLCD01_23       | Areal percent of 2001 land-use and land-cover type Developed, Medium Intensity: Includes areas with a mixture of constructed materials and vegetation. Impervious surfaces account for 50-79 percent of the total cover. These areas most commonly include single-family housing units.                                                                                                                                                                           |
|                          | NLCD01_24       | Areal percent of 2001 land-use and land-cover type Developed, High Intensity: Includes highly developed areas where people reside or work in high numbers. Examples include apartment complexes, row houses, and commercial/industrial. Impervious surfaces account for 80-100 percent of the total cover.                                                                                                                                                        |
|                          | TOTAL_ROAD_DENS | Density of all road types per NHDPlusV2 catchment. Density is defined as the length of road divided by the catchment area.                                                                                                                                                                                                                                                                                                                                        |
|                          | HDENS10         | Historic housing densities for 2010.                                                                                                                                                                                                                                                                                                                                                                                                                              |
| soil_texture_related     | SILTAVE         | Percent of average value of silt content.                                                                                                                                                                                                                                                                                                                                                                                                                         |
|                          | SANDAVE         | Percent of average value of sand content.                                                                                                                                                                                                                                                                                                                                                                                                                         |
| soil_restrictive_related | SRL25AG         | Estimated percent of the soil restrictive layer in the upper 25cm of agricultural land.                                                                                                                                                                                                                                                                                                                                                                           |
|                          | SRL35AG         | Estimated percent of the soil restrictive layer in the upper 35cm of agricultural land.                                                                                                                                                                                                                                                                                                                                                                           |
|                          | SRL45AG         | Estimated percent of the soil restrictive layer in the upper 45cm of agricultural land.                                                                                                                                                                                                                                                                                                                                                                           |
|                          | SRL55AG         | Estimated percent of the soil restrictive layer in the upper 55cm of agricultural land.                                                                                                                                                                                                                                                                                                                                                                           |
| wetd_related             | MAXWD6190       | Watershed average of maximum monthly number of days of measurable precipitation, derived from 30 years of record (1961-1990), 2.3km PRISM.                                                                                                                                                                                                                                                                                                                        |

|              |             |                                                                                                                                                             |
|--------------|-------------|-------------------------------------------------------------------------------------------------------------------------------------------------------------|
|              | WDANN       | NHDPlusV2 catchment value for the 30year annual average (1961-1990) number of days of measurable precipitation.                                             |
| topo_related | EWT         | Average depth to water table relative to the land surface (m).                                                                                              |
|              | TWI         | Topographic wetness index, $\ln(a/S)$ ; where $\ln$ is the natural log, $a$ is the upslope area per unit contour length and $S$ is the slope at that point. |
|              | BASIN_SLOPE | NHDPlusV2 flowline catchment's average slope in percent.                                                                                                    |
| elev_related | ELEV_MEAN   | NHDPlusV2 flowline catchment's mean elevation (m).                                                                                                          |
|              | ELEV_MIN    | NHDPlusV2 flowline catchment's minimum elevation (m).                                                                                                       |
|              | ELEV_MAX    | NHDPlusV2 flowline catchment's maximum elevation (m).                                                                                                       |
